# Supplementary material for: New Water-Ethylene Glycol Lubricants with Stearate Ionic Liquid Crystal Additive
Source: MDPI journal article supplement (doi:10.3390/lubricants10100241), 2022-09-28
Supplement: s1 [file s1]

### Supplementary Material

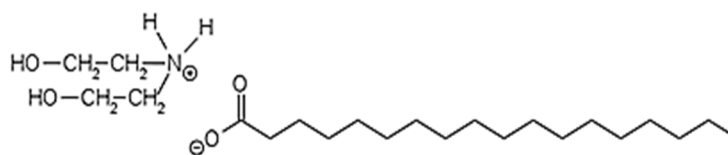

**Figure S1.** Chemical formula of the ionic liquid crystal bis(2-hydroxyethyl)ammonium stearate (DES).

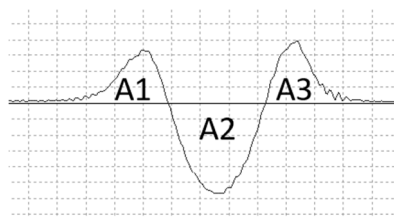

**Figure S2.** Cross section profile of the wear track showing areas measured for wear rate calculation.
